# Supplementary material for: Opposing Roles of Calcium and Intracellular ATP on Gating of the Purinergic P2X2 Receptor Channel
Source: MDPI journal article supplement (doi:10.3390/ijms19041161), 2018-04-11
Supplement: s1 [file s1]

## Supplementary Materials: Opposing Roles of Calcium and Intracellular ATP on Gating of the Purinergic P2X2 Receptor Channel

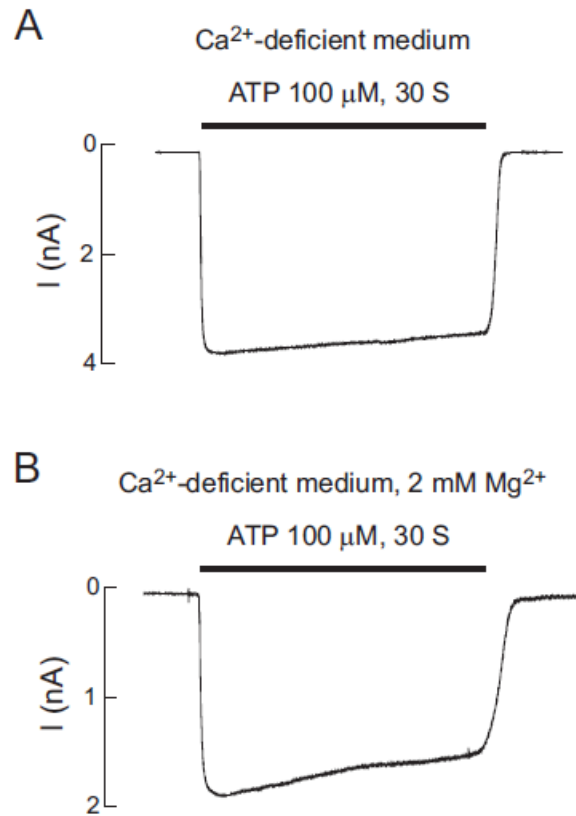

**Figure S1.** **A.** Recording from a P2X2aR-expressing HEK293 cell in bathed in a  $\text{Ca}^{2+}$ -deficient medium with no added of  $\text{Mg}^{2+}$ . **B.** Recording from another P2X2aR-expressing HEK293 cell in similar conditions to the one shown in **A**, but with the presence of 2 mM  $\text{Mg}^{2+}$  in the extracellular solution.
